# Supplementary material for: Recommendations for Patients with High Return to Sports Expectations after TKA Remain Controversial
Source: MDPI journal article supplement (doi:10.3390/jcm10010054), 2020-12-26
Supplement: s1 [file s1]

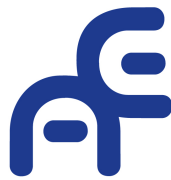

## DEUTSCHE GESELLSCHAFT FÜR ENDOPROTHETIK

### A SURVEY OF THE AE – GERMAN SOCIETY FOR ARTHROPLASTY E.V. TO ASSESS CURRENT RECOMMENDATIONS FOR RETURN TO SPORT AFTER JOINT REPLACEMENT

**Please return your completed survey form at the registration or via mail to**

**Dr. med. PhD Tu-Lan Vu-Han** Centrum für Muskuloskeletale Chirurgie (CMSC) | Charité – Universitätsmedizin  
Berlin, Charitéplatz 1 | 10117 Berlin | Tel. +49 30 450 615 145, E-Mail: [tu-lan.vu-han@charite.de](mailto:tu-lan.vu-han@charite.de)  
– We thank you for your participation!

#### O. Voluntary Information

Name: \_\_\_\_\_ Age: \_\_\_\_\_

Place of practice: \_\_\_\_\_

#### 1 General Questions

1.1 "In which year did you receive your Approbation?"

- ☐ vor 1980
- ☐ 1980 -1990
- ☐ 1990 - 2000
- ☐ 2000 - 2010
- ☐ 2010 – 2020

1.2 "How high do you rate your own athletic activity?"

- ☐ "very high, I do sports daily"
- ☐ "high, I do sports multiple times a week"
- ☐ "medium, I do sports every now and then"
- ☐ "low, I do not do sports"

1.3 "Is the question of the patient's sporting activity before joint replacement part of your standard patient interview?"

- ☐ „Yes“
- ☐ „No“
- ☐ „I do not know“
- ☐ „It does not matter“

1.4 "Which preoperative parameters are relevant for you with regard to postoperative sporting ability in the assessment?"

- ☐ „Age“
- ☐ „Gender“
- ☐ „BMI“
- ☐ „Muscle mass“
- ☐ „Coordination/Experience of the sport before planned surgery“
- ☐ „Bone density“
- ☐ „Neurologic precondition“
- ☐ „Rheumatologic precondition“

1.5 "What do you think is the **main** risk from sport after implantation of an endoprosthesis? (Maximum 2 answers)"

- ☐ "Joint dislocation"
- ☐ "Periprosthetic fracture"
- ☐ "Implant loosening"
- ☐ "Polyethylene-wear"
- ☐ "Periprosthetic infection"
- ☐ "Osteolysis"
- ☐ "Material breach"
- ☐ "Tendon rupture"
- ☐ „Other \_\_\_\_\_ (which?)“

### 3 Specific questions to knee arthroplasty

3.1 "How important do you think sporting activity after knee replacement surgery?"

- ☐ "very important"
- ☐ "important"
- ☐ "not important"
- ☐ "does not matter"

3.2 "Do you think that physical activity has a **negative** impact on the durability of a knee arthroplasty (reduced lifespan)?"

- ☐ „Yes“
- ☐ „No“
- ☐ „Do not know“
- ☐ „Does not matter“

3.3 "Do you think that physical activity has a **positive** impact on the durability of a hip arthroplasty (reduced lifespan)?"

- ☐ „Yes“
- ☐ „No“
- ☐ „Do not know“
- ☐ „Does not matter“

3.4 "The burden that patients with a **knee arthroplasty** expose themselves to is usually ..."

- ☐ "Way too high"
- ☐ "A little too high"
- ☐ "Just right"
- ☐ "Too low"
- ☐ "Way too low"

3.5 "How often do you attribute failure of **hip arthroplasty** to stress overload or sports?"

- ☐ "In more than 50% of revision surgeries"
- ☐ "In more than 25% of revision surgeries"
- ☐ "In more than 10% of revision surgeries"
- ☐ "In more than 5% of revision surgeries"
- ☐ "In more than 1% of revision surgeries"
- ☐ "In less than 1% of revision surgeries"

3.6 "Does a high athletic standard influence the choice of your surgical access route? If yes, which one do you choose?"

- ☐ Yes,  
if yes, which surgical approach do you prefer?
  - ☐ medial parapatellar
  - ☐ subvastus
  - ☐ midvastus
- ☐ No

3.7 "Does a high level of sporting ability influence the desired alignment? If yes, which one?"

- ☐ Yes,  
if yes, which alignment do you prefer?
  - ☐ "mechanical alignment"
  - ☐ "kinematic alignment"
  - ☐ "anatomical alignment, residual varus- or valgus"
- ☐ No

3.8 "Do you prefer a unicondylar sled prosthesis to a bicondylar one in case of high physical demands?"

- ☐ Yes
- ☐ No

3.9 "Does the design of a knee arthroplasty affect athletic ability? If so, which design do you choose?"

- ☐ Yes,  
If yes, which design do you prefer for patients with high return to sports expectations?
  - ☐ Single-Radius
  - ☐ Multi-Radius
  - ☐ J-Curve
  - ☐ Medial-Pivot
  - ☐ andere\_\_\_\_\_ (which design?)
- ☐ No

3.10 "What type of coupling for a TKA do you recommend for the patient's desired sporting activities?"

| Kopplungstyp                                  | High-Impact*          | Low-Impact*           | No Sport              |
|-----------------------------------------------|-----------------------|-----------------------|-----------------------|
| posterior cruciate retaining (PCR)            | <input type="radio"/> | <input type="radio"/> | <input type="radio"/> |
| posterior cruciate substituting (PCS)         | <input type="radio"/> | <input type="radio"/> | <input type="radio"/> |
| Ultracongruent (posterior stabilizing design) | <input type="radio"/> | <input type="radio"/> | <input type="radio"/> |
|                                               |                       |                       |                       |
| Fixed Bearing                                 | <input type="radio"/> | <input type="radio"/> | <input type="radio"/> |
| Mobile Bearing                                | <input type="radio"/> | <input type="radio"/> | <input type="radio"/> |
| Increased tibial shaft length                 | <input type="radio"/> | <input type="radio"/> | <input type="radio"/> |
| Hinged prosthesis                             | <input type="radio"/> | <input type="radio"/> | <input type="radio"/> |

3.11 "Would you advise to apply pain catheters (N. femoralis, N. sciatic nerve) in patients with high athletic activity expectations?"

- ☐ „Yes“,
- ☐ „No“
- ☐ „Does not matter“

3.12 "Does a high athletic standard influence post-treatment (NB)?"

- ☐ Yes,  
wenn ja, welche würden sie in diesem Fall empfehlen?
  - ☐ "Yes, application of a continuous passive motion treatment"
  - ☐ "Yes, enforced rehabilitation"
  - ☐ "Yes, restrictive rehabilitation"
- ☐ No

3.13 "Your patient expresses the wish to return to previously practiced high-impact sports after the knee arthroplasty surgery. Which statement do you make?"

- ☐ "I recommend it without limitations after a certain time of recovery"
- ☐ "I recommend it only after adequate training of the patient in regard to movements and risks."
- ☐ "I recommend no high-impact sports after arthroplasty"
- ☐ "I leave it to the patient and make no specific statement."

3.14 "What is your recommendation for sports after a **total knee arthroplasty (TKA)**?"

| Type of sport | "after 3 months"      | "after 6 months"      | "not recommended"     | "undecided"           |
|---------------|-----------------------|-----------------------|-----------------------|-----------------------|
| High-Impact*  | <input type="radio"/> | <input type="radio"/> | <input type="radio"/> | <input type="radio"/> |
| Low-Impact*   | <input type="radio"/> | <input type="radio"/> | <input type="radio"/> | <input type="radio"/> |

<sup>1</sup>

<sup>1</sup> \*Low impact sports include swimming, walking, pilates, elliptical training. General characteristics are smooth and even body movements. In contrast, high-impact sports include running, skiing, squash, basketball and boxing. They generally have an increased risk for injury due to abrupt movements.

5. "What is your recommendation for patients after **total knee arthroplasty**?"

| Sportart              | without<br>limitation | with training         | not<br>recommended    | undecided             |
|-----------------------|-----------------------|-----------------------|-----------------------|-----------------------|
| "Basketball"          | <input type="radio"/> | <input type="radio"/> | <input type="radio"/> | <input type="radio"/> |
| "Bowling"             | <input type="radio"/> | <input type="radio"/> | <input type="radio"/> | <input type="radio"/> |
| "Boxing/Martial Arts" | <input type="radio"/> | <input type="radio"/> | <input type="radio"/> | <input type="radio"/> |
| "E-Scooter"           | <input type="radio"/> | <input type="radio"/> | <input type="radio"/> | <input type="radio"/> |
| "Fitness/Weights"     | <input type="radio"/> | <input type="radio"/> | <input type="radio"/> | <input type="radio"/> |
| "Soccer"              | <input type="radio"/> | <input type="radio"/> | <input type="radio"/> | <input type="radio"/> |
| "Ballroom Dancing"    | <input type="radio"/> | <input type="radio"/> | <input type="radio"/> | <input type="radio"/> |
| "Golf"                | <input type="radio"/> | <input type="radio"/> | <input type="radio"/> | <input type="radio"/> |
| "Handball"            | <input type="radio"/> | <input type="radio"/> | <input type="radio"/> | <input type="radio"/> |
| "Hockey"              | <input type="radio"/> | <input type="radio"/> | <input type="radio"/> | <input type="radio"/> |
| "Jogging"             | <input type="radio"/> | <input type="radio"/> | <input type="radio"/> | <input type="radio"/> |
| "Climbing"            | <input type="radio"/> | <input type="radio"/> | <input type="radio"/> | <input type="radio"/> |
| "Pilates"             | <input type="radio"/> | <input type="radio"/> | <input type="radio"/> | <input type="radio"/> |
| "Biking level"        | <input type="radio"/> | <input type="radio"/> | <input type="radio"/> | <input type="radio"/> |
| "Biking cross"        | <input type="radio"/> | <input type="radio"/> | <input type="radio"/> | <input type="radio"/> |
| "Horseback riding"    | <input type="radio"/> | <input type="radio"/> | <input type="radio"/> | <input type="radio"/> |
| "Rowing"              | <input type="radio"/> | <input type="radio"/> | <input type="radio"/> | <input type="radio"/> |
| "Swimming"            | <input type="radio"/> | <input type="radio"/> | <input type="radio"/> | <input type="radio"/> |
| "Ski slope"           | <input type="radio"/> | <input type="radio"/> | <input type="radio"/> | <input type="radio"/> |
| "Ski long"            | <input type="radio"/> | <input type="radio"/> | <input type="radio"/> | <input type="radio"/> |
| "Walking"             | <input type="radio"/> | <input type="radio"/> | <input type="radio"/> | <input type="radio"/> |
| "Squash"              | <input type="radio"/> | <input type="radio"/> | <input type="radio"/> | <input type="radio"/> |
| "Surfing"             | <input type="radio"/> | <input type="radio"/> | <input type="radio"/> | <input type="radio"/> |
| "Dancing"             | <input type="radio"/> | <input type="radio"/> | <input type="radio"/> | <input type="radio"/> |
| "Tennis"              | <input type="radio"/> | <input type="radio"/> | <input type="radio"/> | <input type="radio"/> |
| "Table tennis"        | <input type="radio"/> | <input type="radio"/> | <input type="radio"/> | <input type="radio"/> |
| "Gymnastics"          | <input type="radio"/> | <input type="radio"/> | <input type="radio"/> | <input type="radio"/> |
| "Volleyball"          | <input type="radio"/> | <input type="radio"/> | <input type="radio"/> | <input type="radio"/> |
| "Hiking"              | <input type="radio"/> | <input type="radio"/> | <input type="radio"/> | <input type="radio"/> |
| "Yoga"                | <input type="radio"/> | <input type="radio"/> | <input type="radio"/> | <input type="radio"/> |

**Please return your questionnaire at the reception or via e-mail to**  
**Dr. med. Tu-Lan Vu-Han, PhD** Centrum für Muskuloskeletale Chirurgie (CMSC) | Charité –  
 Universitätsmedizin Berlin, Charitéplatz 1 | 10117 Berlin | Tel. +49 30 450 615 145, E-Mail: [tu-lan.vu-han@charite.de](mailto:tu-lan.vu-han@charite.de)  
 – We thank you for your participation!
